# Supplementary material for: Antibacterial Properties of Honey Nanocomposite Fibrous Meshes
Source: MDPI journal article supplement (doi:10.3390/polym14235155), 2022-11-27
Supplement: s1 [file s1]

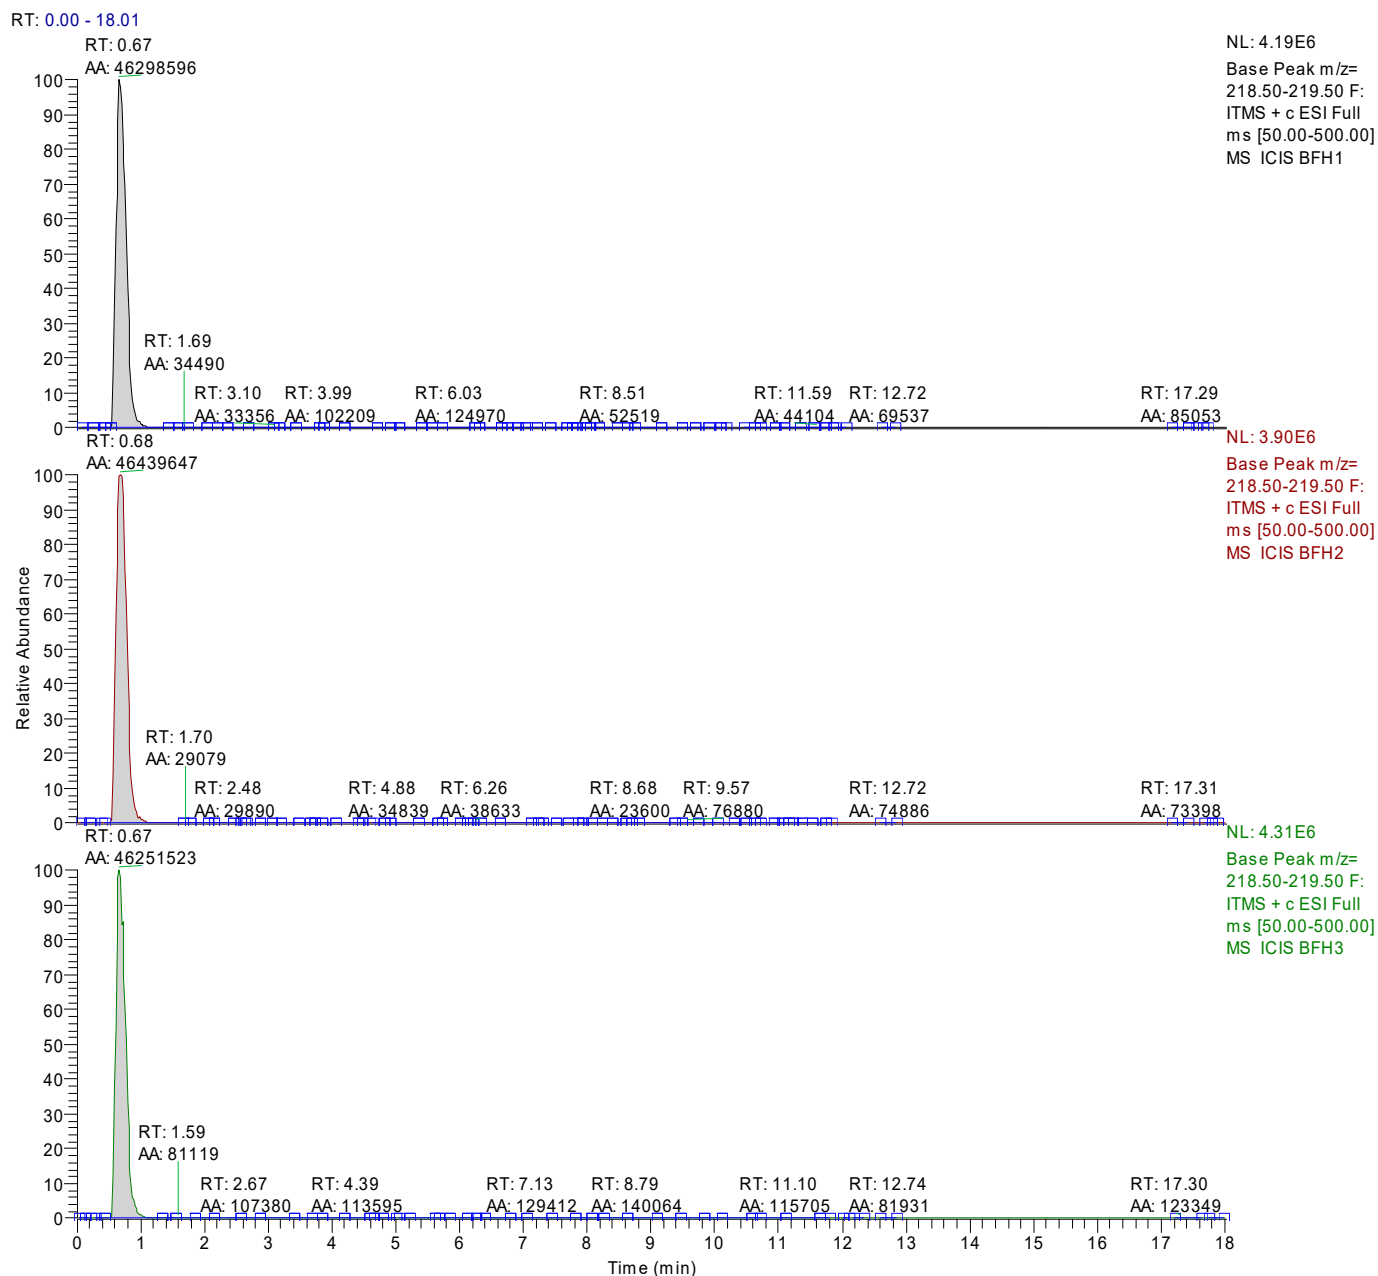

Figure S1. Black Forest honey samples (triplicates): reconstructed ion chromatogram for  $m/z$  219  $[M+Na]^+$

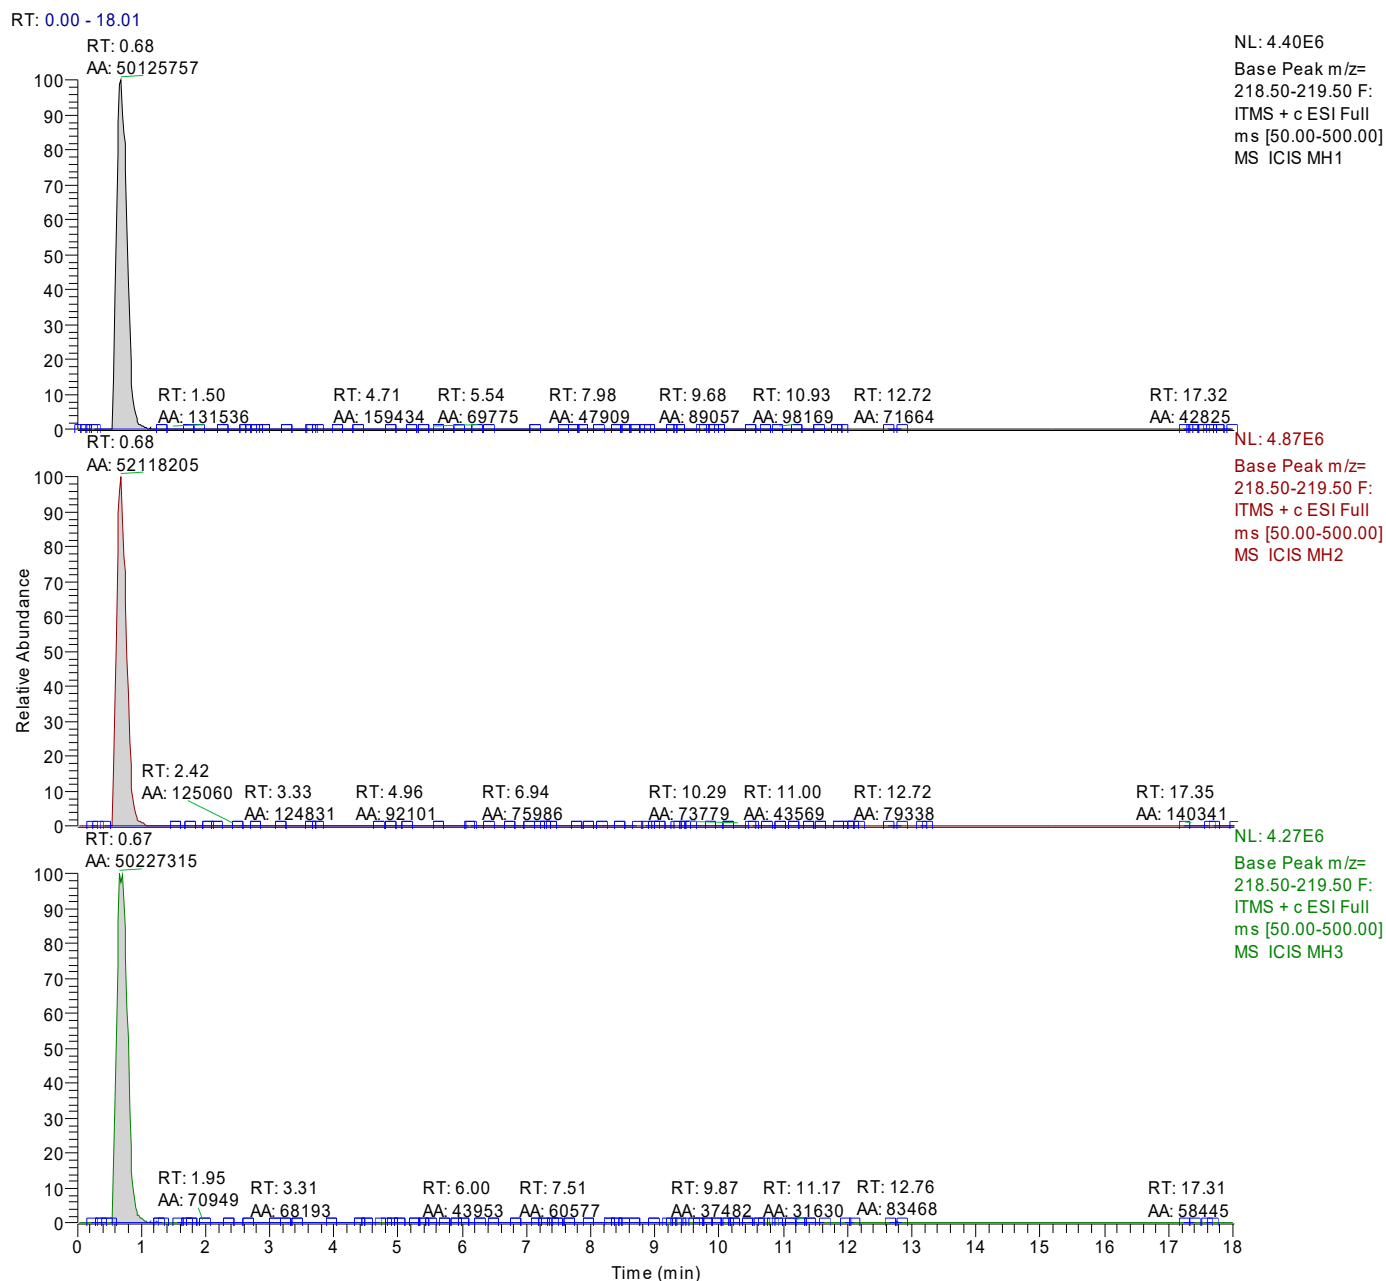

Figure S2. Manuka honey samples (triplicates): reconstructed ion chromatogram for  $m/z$  219  $[M+Na]^+$

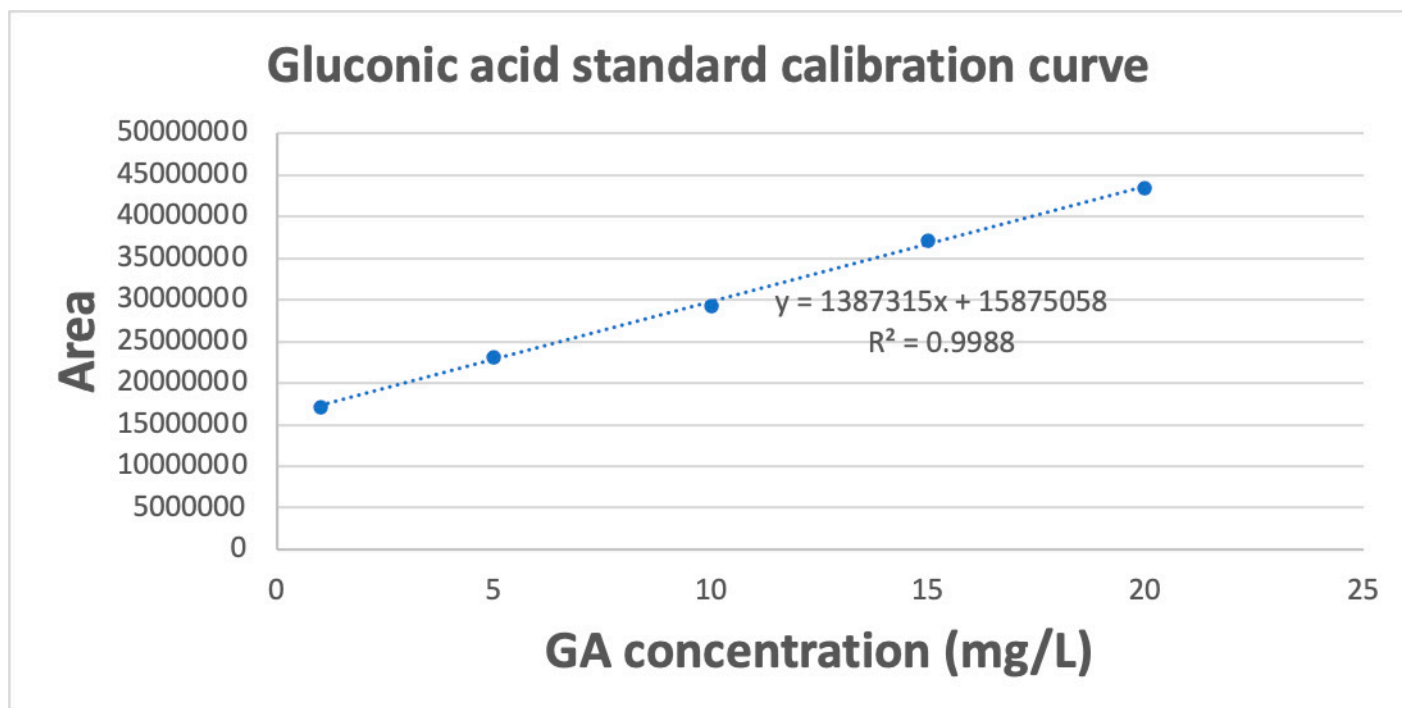

Figure S3. A calibration curve of diluted gluconic acid standard (0, 1, 5, 10, 15, 20 mg/L)
